# Supplementary material for: 3D printable acrylate polydimethylsiloxane resins for cell culture and drug testing
Source: Royal Society of Chemistry journal article supplement (doi:10.1039/d3bm00152k), 2023-01-01
Supplement: d3bm00152k1.pdf [file d3bm00152k1.pdf]

## Supporting Information

### 3D Printable Acrylate Polydimethylsiloxane Resins for Cell Culture and Drug Testing

*Simona Villata, Marta Canta, Désirée Baruffaldi, Alice Pavan, Annalisa Chiappone, Candido Fabrizio Pirri, Francesca Frascella\*, Ignazio Roppolo*

### Printing Parameters

**Table S1.** printing parameters for each TEGORad formulation

| Dye Concentration wt.% | Range   | Exposure Time s | Separation Velocity mm/s | Light Intensity mW/cm <sup>2</sup> | Wait Time (After Approach) s |
|------------------------|---------|-----------------|--------------------------|------------------------------------|------------------------------|
| 0.075                  | Burn-in | 7.0             | 2.7                      |                                    |                              |
|                        | 1       | 6.0             | 2.7                      |                                    |                              |
|                        | 2       | 5.0             | 2.0                      | 48                                 | 0.5                          |
|                        | 3       | 4.0             | 2.0                      |                                    |                              |
|                        | 4       | 3.0             | 1.5                      |                                    |                              |
| 0.05                   | Burn-in | 5.0             | 2.0                      |                                    |                              |
|                        | 1       | 4.5             | 2.0                      |                                    |                              |
|                        | 2       | 3.5             | 1.5                      | 48                                 | 0.5                          |
|                        | 3       | 3.0             | 1.0                      |                                    |                              |
|                        | 4       | 2.7             | 1.0                      |                                    |                              |
| 0.01                   | Burn-in | 3.5             | 1.5                      |                                    |                              |
|                        | 1       | 3.0             | 1.5                      |                                    |                              |
|                        | 2       | 2.5             | 1.0                      | 48                                 | 0.5                          |
|                        | 3       | 2.0             | 1.0                      |                                    |                              |
|                        | 4       | 1.5             | 1.0                      |                                    |                              |

### DMTA analysis

The modulus has been evaluated only on the PDMS and Acrylate PDMS samples at 0.075 wt.% dye as this Acrylate PDMS formulation is the most different from the reference material (Sylgard 184). It is well known that PDMS, being a linear siloxane molecule characterized by

Si-O groups, shows a single glass transition temperature, that is, a single mobility changes at -120 ° C.<sup>[1]</sup> In Figure S1 it is possible to see the modulus curve from -80°C and while in PDMS the modulus shows a continuous and smooth reduction, in Acrylate PDMS it is possible to notice a sharp transition at indicatively -50°C.

Anyway, approaching room temperature, the modulus of Acrylate PDMS is very similar to the one of PDMS, resulting in similar flexibility of the two materials.

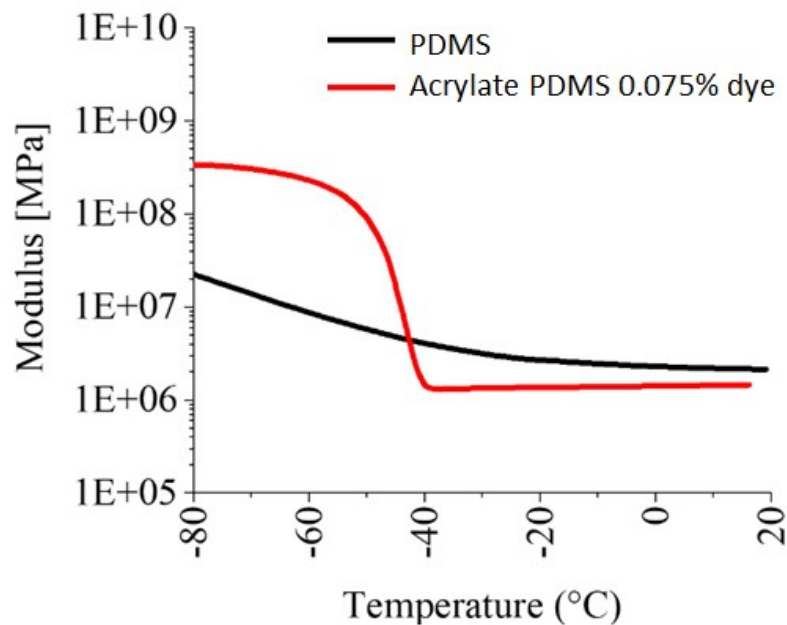

**Figure S1.** PDMS and Acrylate PDMS 0.075% dye modulus resulting from DMTA analysis.

## Surface Characterization after plasma O<sub>2</sub>

The materials were subjected to O<sub>2</sub> plasma treatment and the surface properties were analyzed by means of contact angle analysis (OCA) and Attenuated Total Reflection FT-IR and surface profiler. OCA measurements (Table S2) show that as-prepared materials have very hydrophobic surfaces ( $\Theta_{H_2O} > 100^\circ$  for all the tested specimens), while, as expected, surface energies increase after plasma treatment. This is related to an increase of the polar component, which results in low contact angle with water drop ( i.e. hydrophilic surfaces).

**Table S2.** OCA output on the tested surfaces

| Samples                                   | Contact Angle value ( $\theta$ ) |                                | Surface Energy (SE) |       |       |
|-------------------------------------------|----------------------------------|--------------------------------|---------------------|-------|-------|
|                                           | H <sub>2</sub> O                 | CH <sub>2</sub> I <sub>2</sub> | Dispersive          | Polar | Total |
| PDMS                                      | 104.1                            | 87.9                           | 3.63                | 23.16 | 26.79 |
| PDMS PLO <sub>2</sub>                     | 49.1                             | 58.4                           | 20.35               | 24.59 | 44.94 |
| Acrylate PDMS 0.01% dye                   | 105.2                            | 94.8                           | 9.97                | 0.67  | 10.65 |
| Acrylate PDMS 0.01% dye PLO <sub>2</sub>  | 38.8                             | 55.5                           | 19                  | 38.66 | 57.66 |
| Acrylate PDMS 0.05% dye                   | 123.4                            | 101.5                          | 8.41                | 0.3   | 8.71  |
| Acrylate PDMS 0.05% dye PLO <sub>2</sub>  | 29.1                             | 48                             | 23.88               | 40.41 | 64.29 |
| Acrylate PDMS 0.075% dye                  | 142.5                            | 119.3                          | 2.97                | 0.05  | 3.03  |
| Acrylate PDMS 0.075% dye PLO <sub>2</sub> | 17.7                             | 44                             | 26.81               | 42.6  | 69.41 |

Also ATR measurements are in good agreement with these results. In Figure S2, pristine surfaces are compared. As it is possible to observe, all the spectra are very similar, evidencing typical main absorption peaks of PDMS 785 cm<sup>-1</sup> (-CH<sub>3</sub> rocking and Si-C stretching in Si-CH<sub>3</sub>), 1006 cm<sup>-1</sup> (Si-O-Si stretching), 1260 cm<sup>-1</sup> (CH<sub>3</sub> deformation in Si-CH<sub>3</sub>), and 2960 cm<sup>-1</sup> (asymmetric CH<sub>3</sub> stretching in Si-CH<sub>3</sub>). After plasma O<sub>2</sub> (Figure S2b) an additional large hydroxyl band around 3400 cm<sup>-1</sup> appears (grey rectangle in the graphs), indicating the presence of polar groups and oxidation of the surface. The presence of such polar groups is consequently reflected in an increase of hydrophilicity, as evidenced by OCA.

Interestingly, as also observed in OCA, increasing the amount of dye, larger oxidation and, in turns, higher hydrophilicity is achieved. This result is quite surprising considering the low amount of dye present in the tested formulations and needs further investigations in the future, aiming at using this ingredient to better tailor the surface properties.

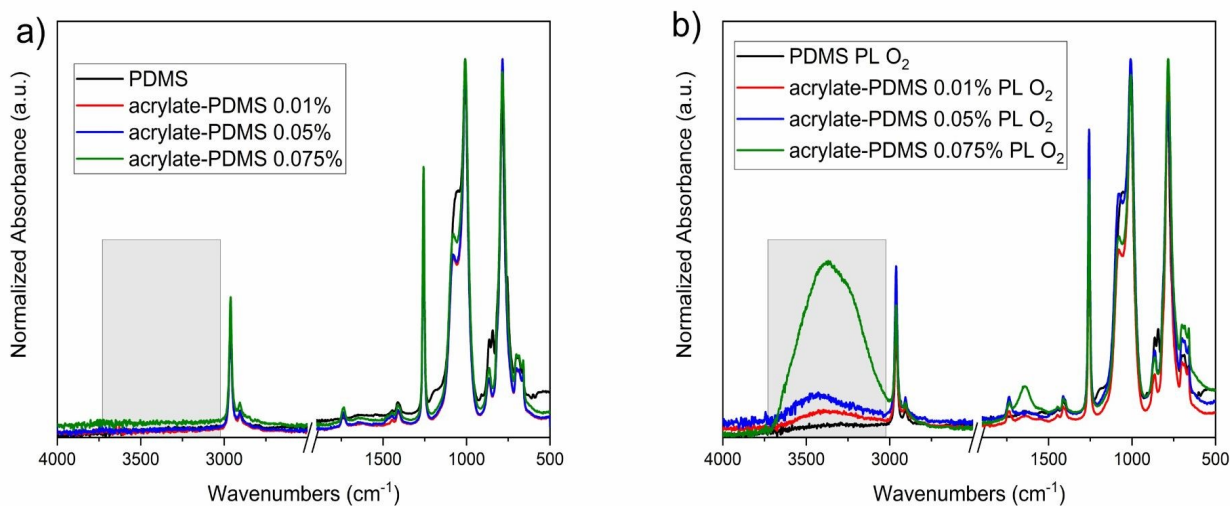

**Figure S2.** ATR spectra of a) as-prepared materials and b) of the materials' surfaces after plasma O<sub>2</sub> treatment.

Surface roughness measurements showed a decrease of Ra value, i.e. the average surface roughness for the length of the measurement performed, in O<sub>2</sub> plasma treated samples (Table S3). A smoother surface after the treatment is surely due to the etch process occurring during the plasma process.

**Table S3.** Surface Roughness output on the tested surfaces

| Samples                                   | Ra (micron) |
|-------------------------------------------|-------------|
| PDMS                                      | 1.8         |
| PDMS PLO <sub>2</sub>                     | 0.6         |
| Acrylate PDMS 0.01% dye                   | 1.4         |
| Acrylate PDMS 0.01% dye PLO <sub>2</sub>  | 0.4         |
| Acrylate PDMS 0.05% dye                   | 1.5         |
| Acrylate PDMS 0.05% dye PLO <sub>2</sub>  | 0.7         |
| Acrylate PDMS 0.075% dye                  | 1.3         |
| Acrylate PDMS 0.075% dye PLO <sub>2</sub> | 0.8         |

[1] A. P. Munaro, G. P. da Cunha, J. G. Filgueiras, J. M. Pinto, M. Munaro, E. R. de Azevedo, L. C. Akcelrud, *Polymer Degradation and Stability* **2019**, *166*, 300.
